# Supplementary material for: A 3D glacier-dynamics line-plume model to estimate the frontal ablation of Hansbreen, Svalbard
Source: Copernicus journal article supplement (doi:10.5194/tc-2023-144), 2023-09-29

New Figure 2: last stake position included in (a); modelled velocities included in (b) so that they can be compared with observed velocities (in the last stake).

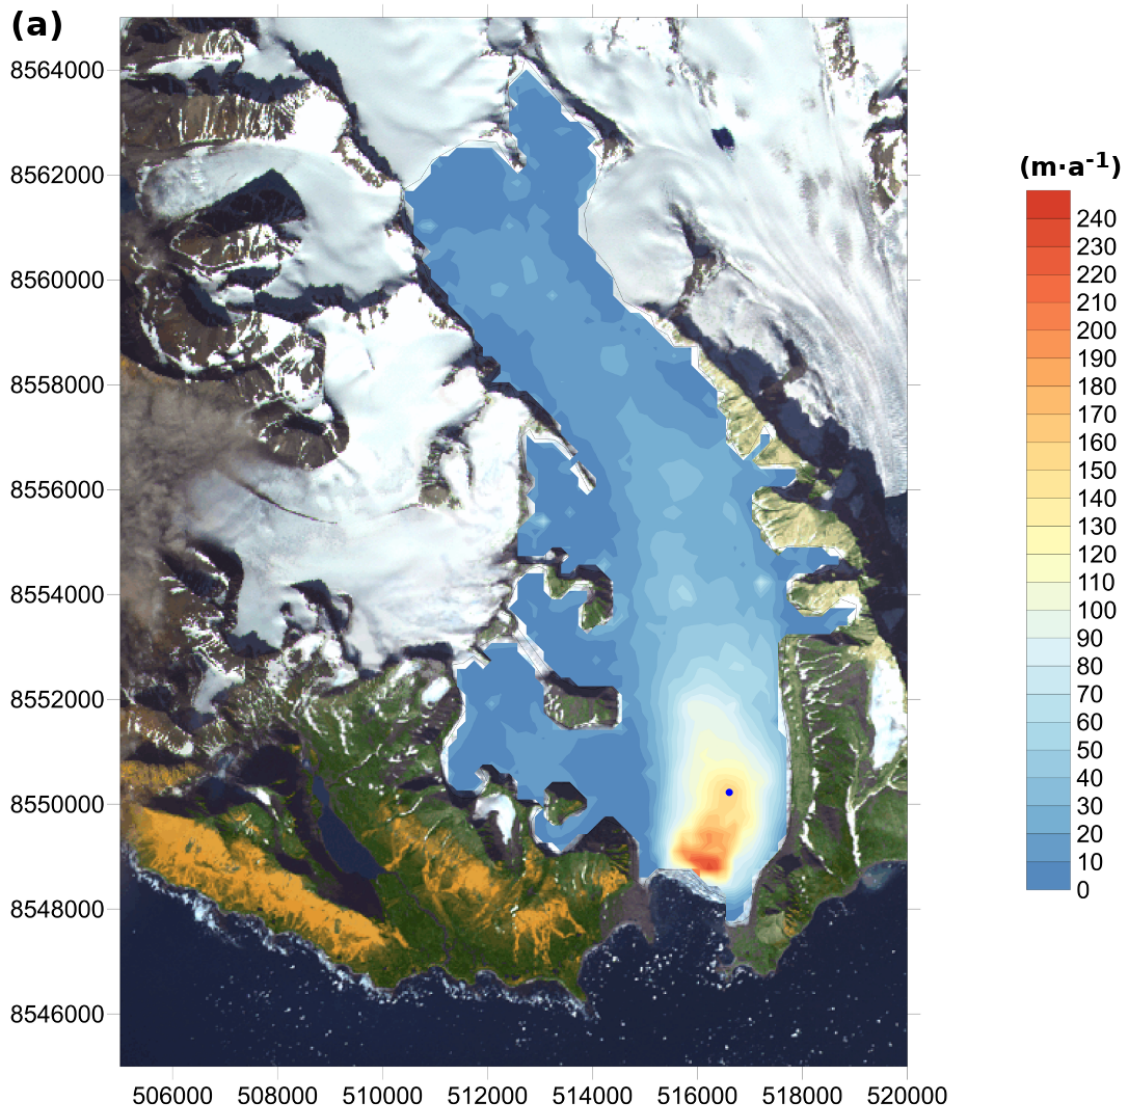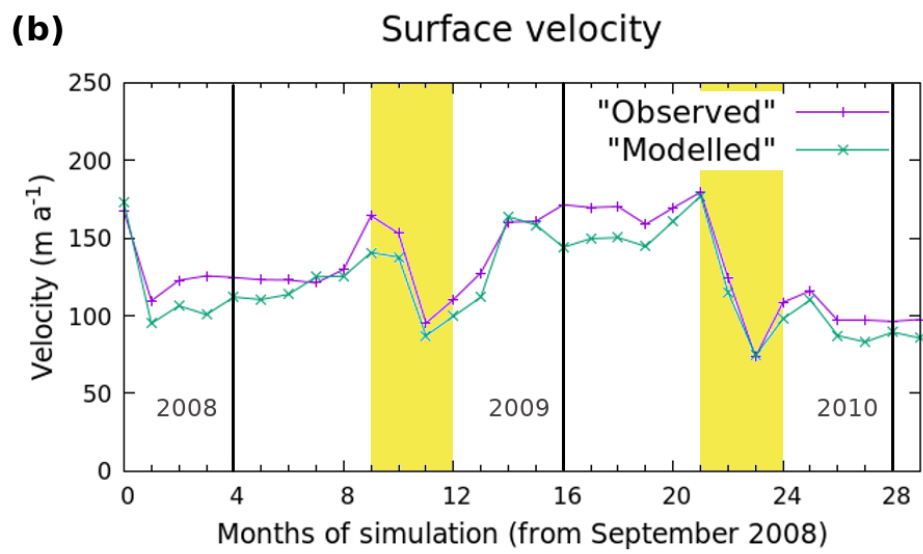

**New Figure 4: CTD seasonal data included (b); number of calving events replaced by calving volume (e).**

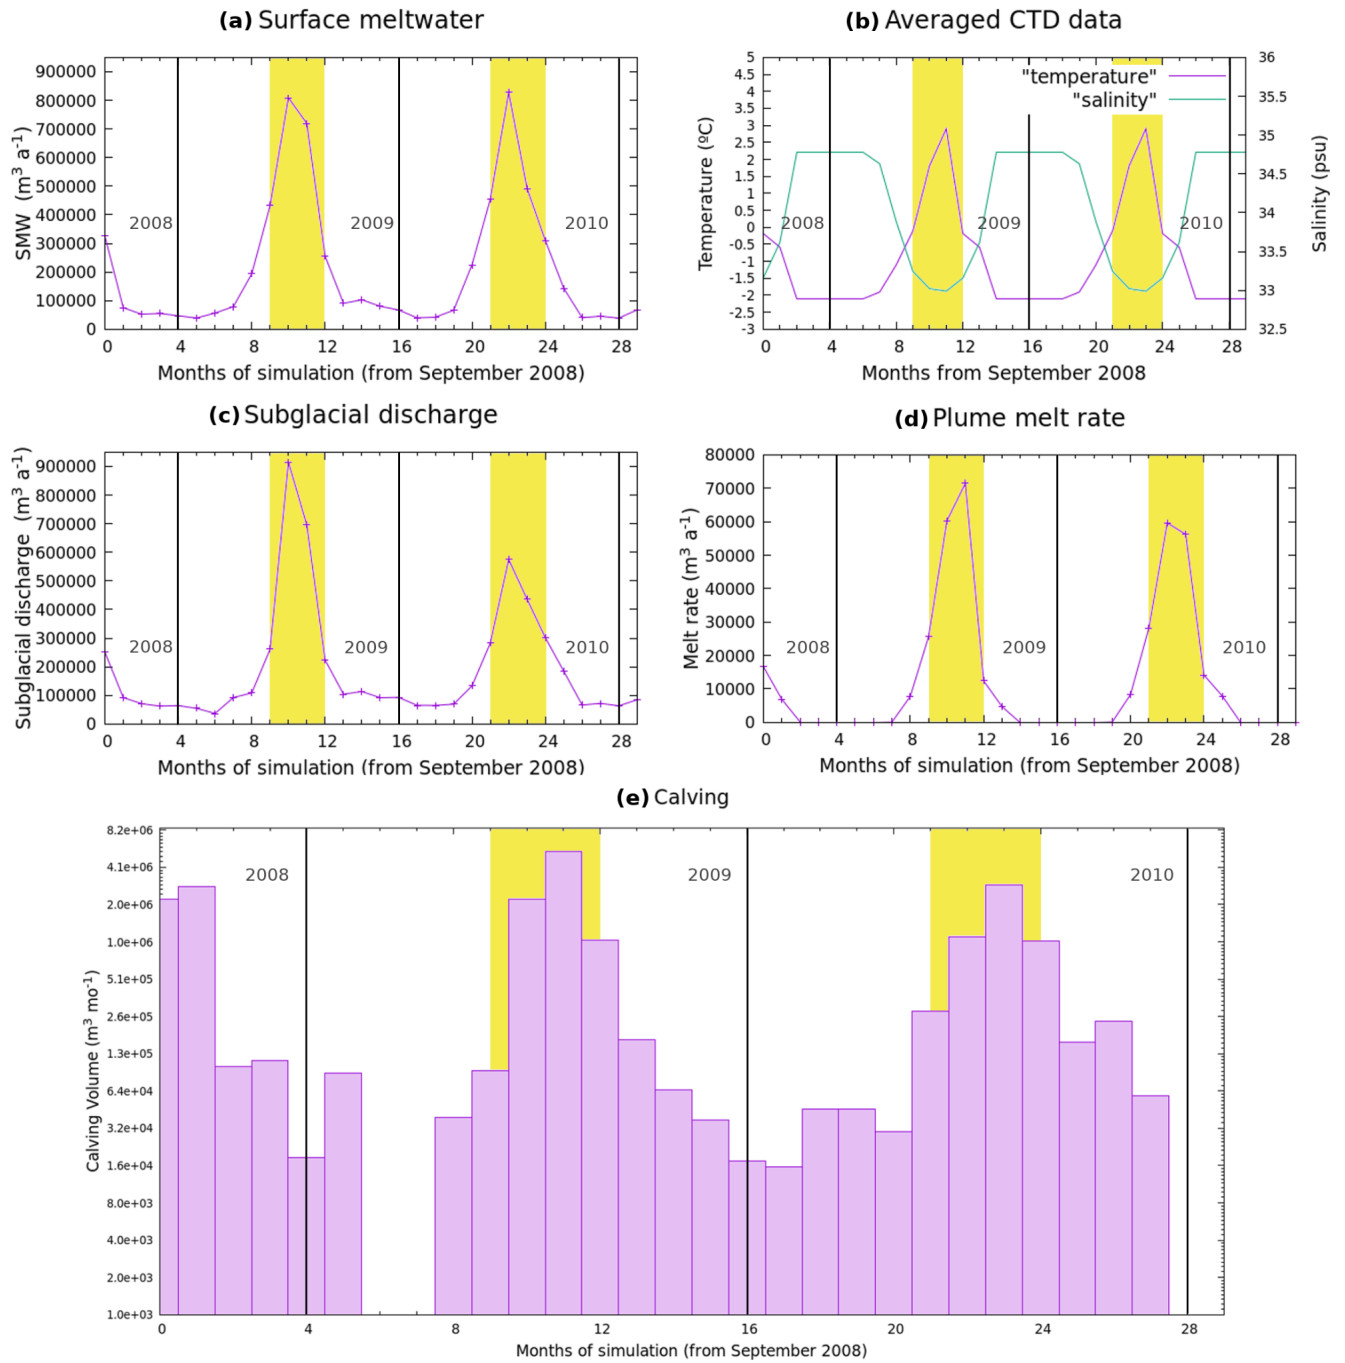

New Figure 5: observed glacier length change included in (b).

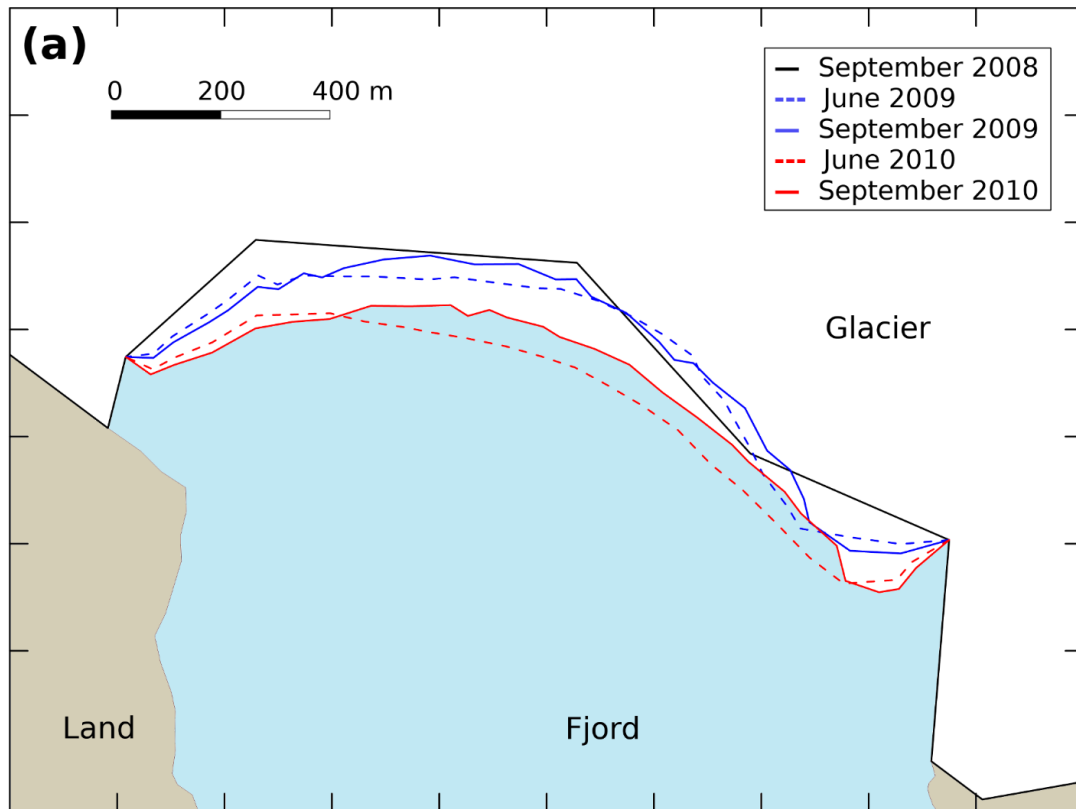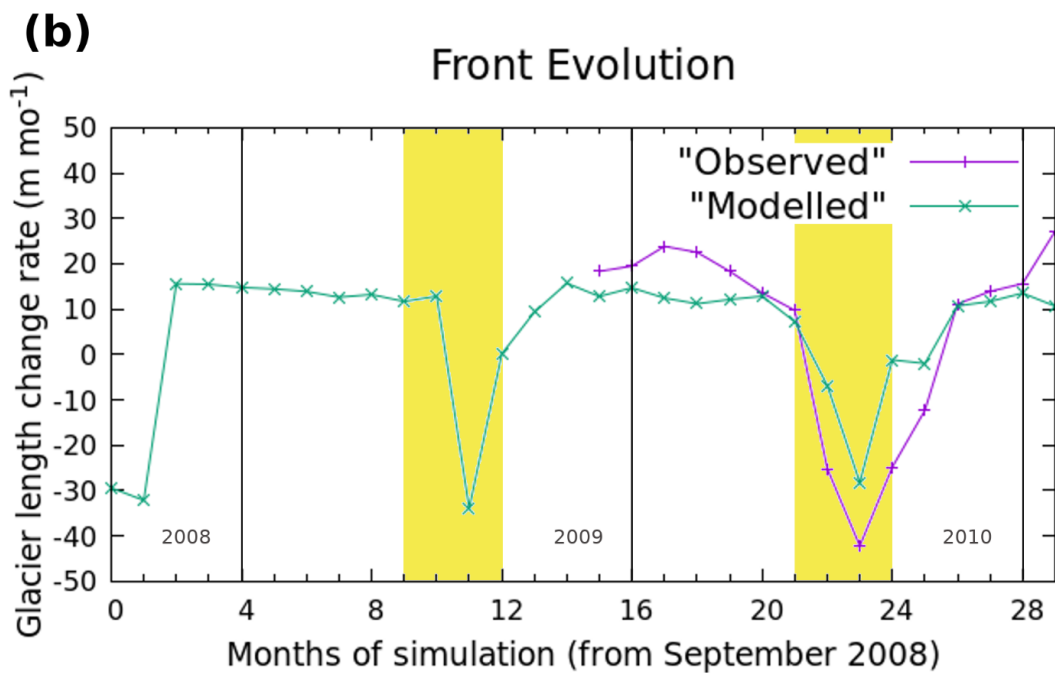

Supplement: Supplementary file [file tc-2023-144-AC2-supplement.pdf]
